# Supplementary material for: The optimization of hydrogen evolution performance by removing guest molecules in Co-MOF
Source: Royal Society of Chemistry journal article supplement (doi:10.1039/d5ce00014a), 2025-01-01
Supplement: d5ce00014a1.pdf [file d5ce00014a1.pdf]

## The optimization of hydrogen evolution performance by removing guest molecule in Co-MOF

Xiang-Yu Chen<sup>a</sup>, Zi-Ang Hu<sup>a</sup>, Yan Qu<sup>a</sup>, Ru-Jin Ning<sup>a</sup>, Wen-Da Tao<sup>b</sup>, Shou-Qin He<sup>b</sup>, Zhi-Fu Liu<sup>a</sup>, Yong-Hui Shen<sup>c</sup>, Ling Qin<sup>\*,a,b</sup>

*a. School of Chemistry and Chemical Engineering, Hefei University of Technology, Hefei, 230009, Anhui, P. R. China.*

*b. Anhui Shenlanhua Colour Co., LTD, Xuancheng, 242000, Anhui, P. R. China*

*c. Anhui Aochuang Environment Testing Co., LTD, Fuyang, 236073, Anhui, P.R.China*

### 1.1 Characterization instrument

X-ray diffraction (XRD) is measured on a fixed target X-ray diffractometer (PANalytical X-Pert PRO MPD) using Cu-K $\alpha$  radiation (1.5418 Å). X-ray photoelectron spectrum (XPS) measurement was performed on ESCALAB250Xi spectrometer (Thermo) using Al K $\alpha$  radiation. The crystal data was collected on a Agilent Gemini E diffractometer (Mo, 50 kV, 40 mA or Cu, 40 kV, 40 mA) and reduced by CrysAlisPro (Rigaku). The structures were solved by direct methods using SHELXS-97. Refinements were performed with SHELXL-2018 using fullmatrix least-squares calculations on F<sup>2</sup>, with anisotropic displacement parameters for all the nonhydrogen atoms. Thermogravimetric measurements are performed on the Thermogravimetric Analyzer (TGA 8000).

### 1.2 High-resolution spectrum of Co-PIPA-800 and Co-PIPA-ethanol-800.

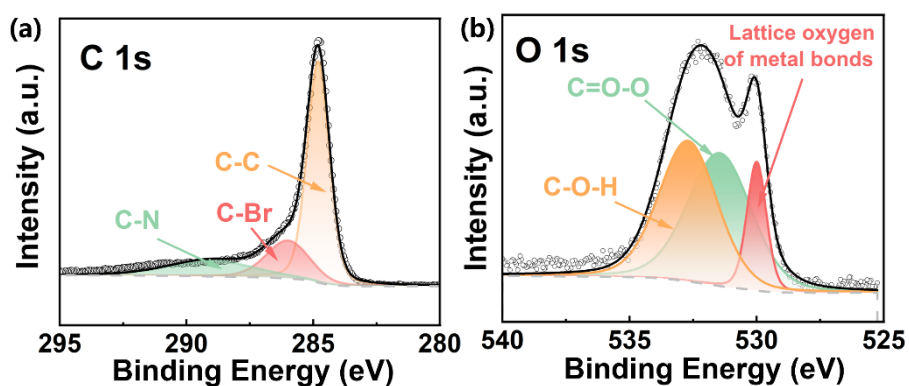

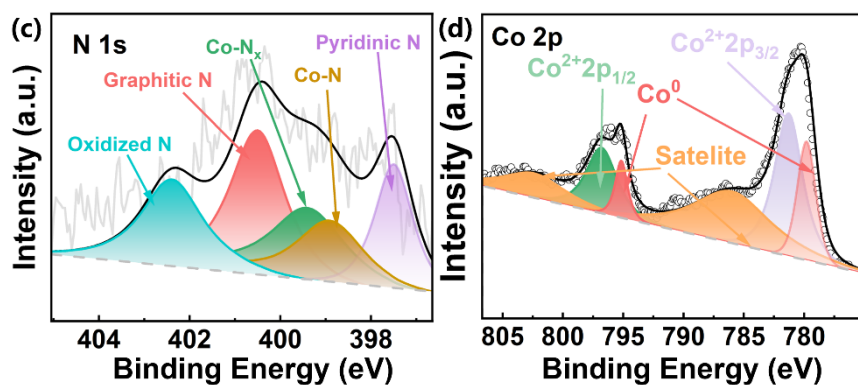

Fig S1 High-resolution spectrum of Co-PIPA-800: (a) C; (b) N; (c) O; (d) Co.

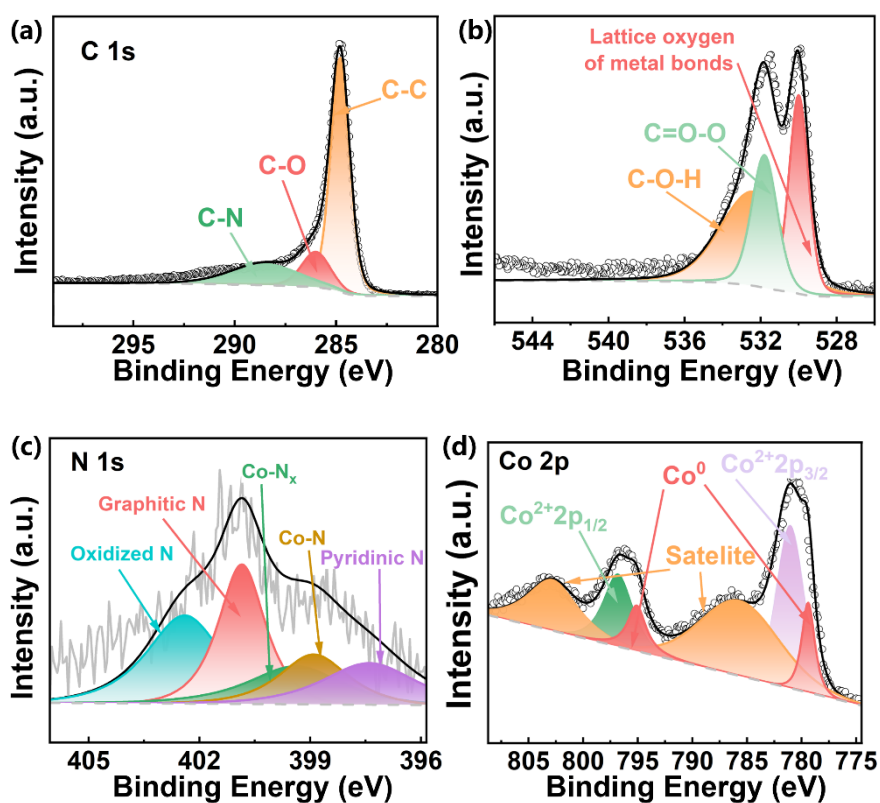

Fig S2 High-resolution spectrum of Co-PIPA-ethanol-800: (a) C; (b) N; (c) O; (d) Co.

Table S1 Comparison of HER performance of previous catalysts

| Material                                | Testing<br>condition          | $E_{j=10}$ VS<br>RHE (mV) | Tafel Slope<br>( $\text{mV} \cdot \text{dec}^{-1}$ ) | REF        |
|-----------------------------------------|-------------------------------|---------------------------|------------------------------------------------------|------------|
| <b>Co-PIPA-700</b>                      | 0.5 M $\text{H}_2\text{SO}_4$ | 551                       | 349.6                                                | This paper |
| <b>Co-PIPA-800</b>                      | 0.5 M $\text{H}_2\text{SO}_4$ | 328                       | 323.1                                                | This paper |
| <b>Co-PIPA-900</b>                      | 0.5 M $\text{H}_2\text{SO}_4$ | 399.1                     | 154.4                                                | This paper |
| <b>Co-PIPA-ethanol-<br/>800</b>         | 0.5 M $\text{H}_2\text{SO}_4$ | 151                       | 70.4                                                 | This paper |
| <b>Mo MOF/Zif67/Mo<br/>MOF (560 °C)</b> | 0.5 M $\text{H}_2\text{SO}_4$ | 240                       | 172                                                  | 40         |
| <b>Cu/Cu<sub>2</sub>S@C</b>             | 0.5 M $\text{H}_2\text{SO}_4$ | 196                       | 101                                                  | 41         |
